# Supplementary material
Source: MDPI journal article supplement (https://www.mdpi.com/2073-4395/13/4/1111)
Supplement: s1 [file s1 › agronomy-2326125-supplementary.pdf]

## Supplementary material

### Biochar Amends Saline Soil and Enhances Maize Growth: Three-Year Field Experiment Findings

Yan Yue <sup>1,2</sup>, Qimei Lin <sup>3,\*</sup>, Guitong Li <sup>2</sup>, Xiaorong Zhao <sup>2</sup> and Hao Chen <sup>2,4</sup>

<sup>1</sup> Engineering & Technology Center of Electrochemistry, School of Chemistry and Chemical Engineering, Qilu University of Technology (Shandong Academy of Sciences), Jinan, 250353, China

<sup>2</sup> College of Land Science and Technology, China Agricultural University, Beijing 100193, China

<sup>3</sup> Institute of Agricultural Resources and Environment, Guangdong Academy of Agricultural Sciences, Guangzhou, 510640, China

<sup>4</sup> School of Agriculture, Sun Yat-Sen University, Guangzhou, 510275, China

\* Correspondence: linqm@cau.edu.cn; Tel.: 86-10-62732502

**Table S1.** Mean precipitation and air temperature in Hetao Irrigation area from 2014 to 2016.

| Treatments | Precipitation (mm) |        |        | Air temperature (°C) |       |       |
|------------|--------------------|--------|--------|----------------------|-------|-------|
|            | 2014               | 2015   | 2016   | 2014                 | 2015  | 2016  |
| Spring     | 49.53              | 41.4   | 42.16  | 10.5                 | 9.21  | 9.84  |
| Summer     | 315.47             | 65.79  | 519.18 | 19.92                | 20.47 | 20.28 |
| Autumn     | 146.56             | 154.94 | 126.49 | 8.44                 | 7.88  | 8.29  |
| Winter     | 4.06               | 28.7   | 36.32  | -6.18                | -4.94 | -7.11 |

**Table S2.** Changes of exchangeable sodium in sulfate saline soils amended with biochar at various rates from 2014 to 2016 (cmol kg<sup>-1</sup>).

| Treatments | 2014    | 2015   | 2016    |
|------------|---------|--------|---------|
| B0         | 1.83 ab | 2.21 a | 3.12 a  |
| B30        | 2.39 a  | 2.31 a | 2.87 ab |
| B75        | 1.21 b  | 1.63 b | 2.37 ab |
| B175       | 1.18 b  | 1.61 b | 2.16 b  |

Different letters in the same column indicate the significant difference between different treatments ( $p < 0.05$ ).
